# Supplementary material for: An analytical solution for two-dimensional vacuum preloading combined with electro-osmosis consolidation using EKG electrodes
Source: PLOS journal article supplement (doi:10.1371/journal.pone.0180974), 2017-08-03
Supplement: S4 (10.1371/journal.pone.0180974.s004) [file journal.pone.0180974.s004]

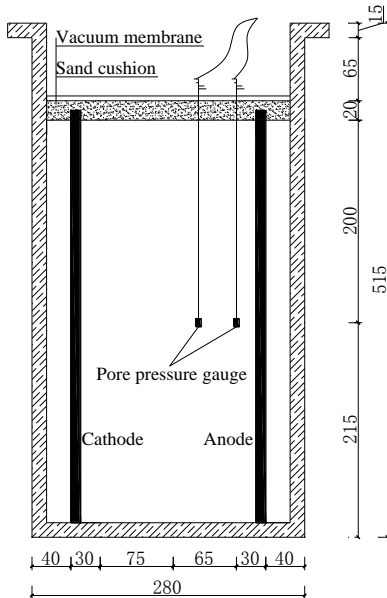

**Fig 4 Diagram of vacuum preloading combined with electro-osmosis model device**
